# Supplementary material
Source: PubMed Central journal article supplement (PMC2941891)

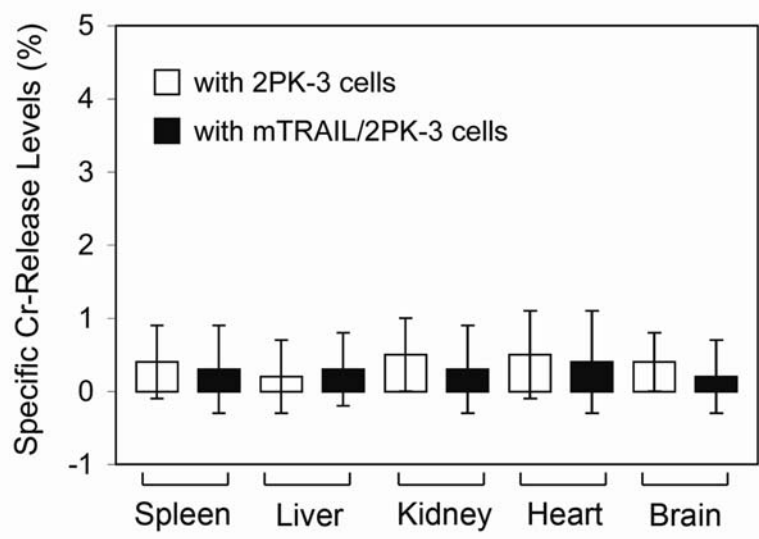

Supplement: NIHMS225548-supplement-Figure.pdf [file NIHMS225548-supplement-Figure.pdf]
